# Supplementary material
Source: PubMed Central journal article supplement (PMC8561634)
Supplement: EMBJ-40-e108028-s006.pdf [file EMBJ-40-e108028-s006.pdf]

Expanded View Figures

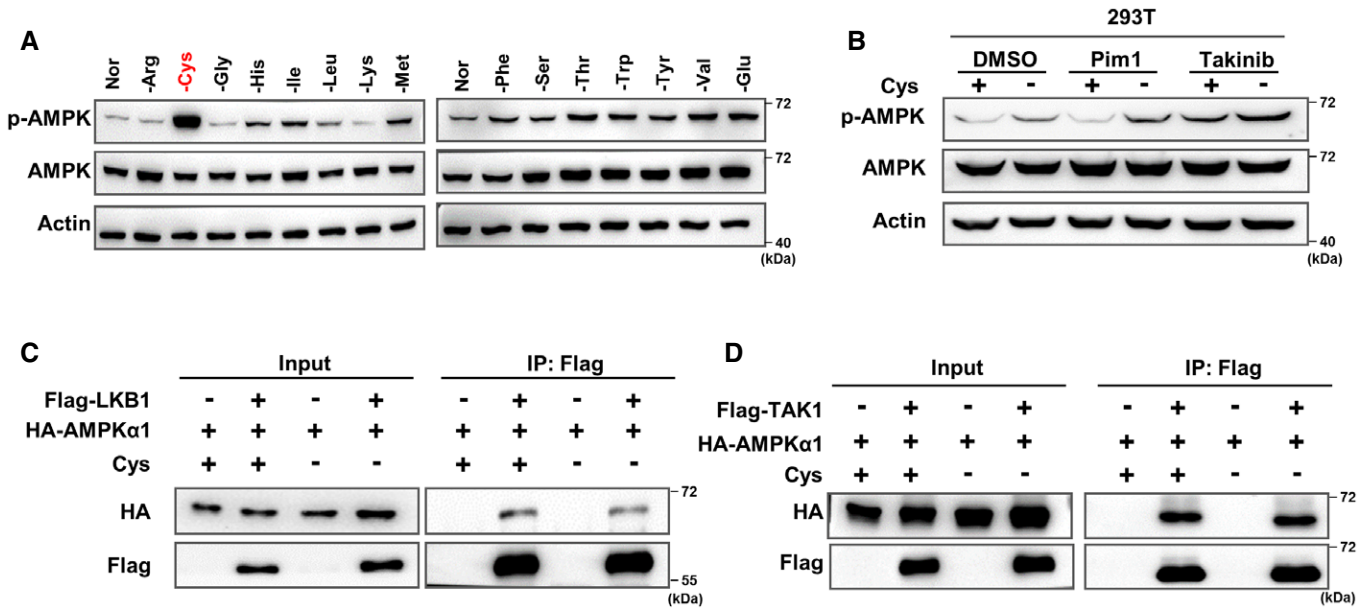

**Figure EV1. Cystine starvation activates AMPK through CaMKK2 instead of LKB1 or TAK1.**

A RCC4 cells were cultured in complete medium for 24 h and then replaced and cultured with the corresponding amino acid-deficient medium for 24 h, followed by WB detection of p-AMPK and total AMPK protein expression. Actin served as the loading control.

B WB analysis of p-AMPK and total AMPK in 293T cells treated with DMSO, 1  $\mu$ M Pim1 or 100 nM TAKINIB for 8 h under cystine deprivation. Actin served as the loading control.

C, D 293T cells were transfected with HA-AMPK $\alpha$ 1 alone or with Flag-LKB1 (C) or Flag-TAK1 (D) alone for 48 h and then cultured with cystine-deficient medium for 8 h. Cell lysates were immunoprecipitated with anti-Flag antibody, and a WB analysis was performed.

Source data are available online for this figure.

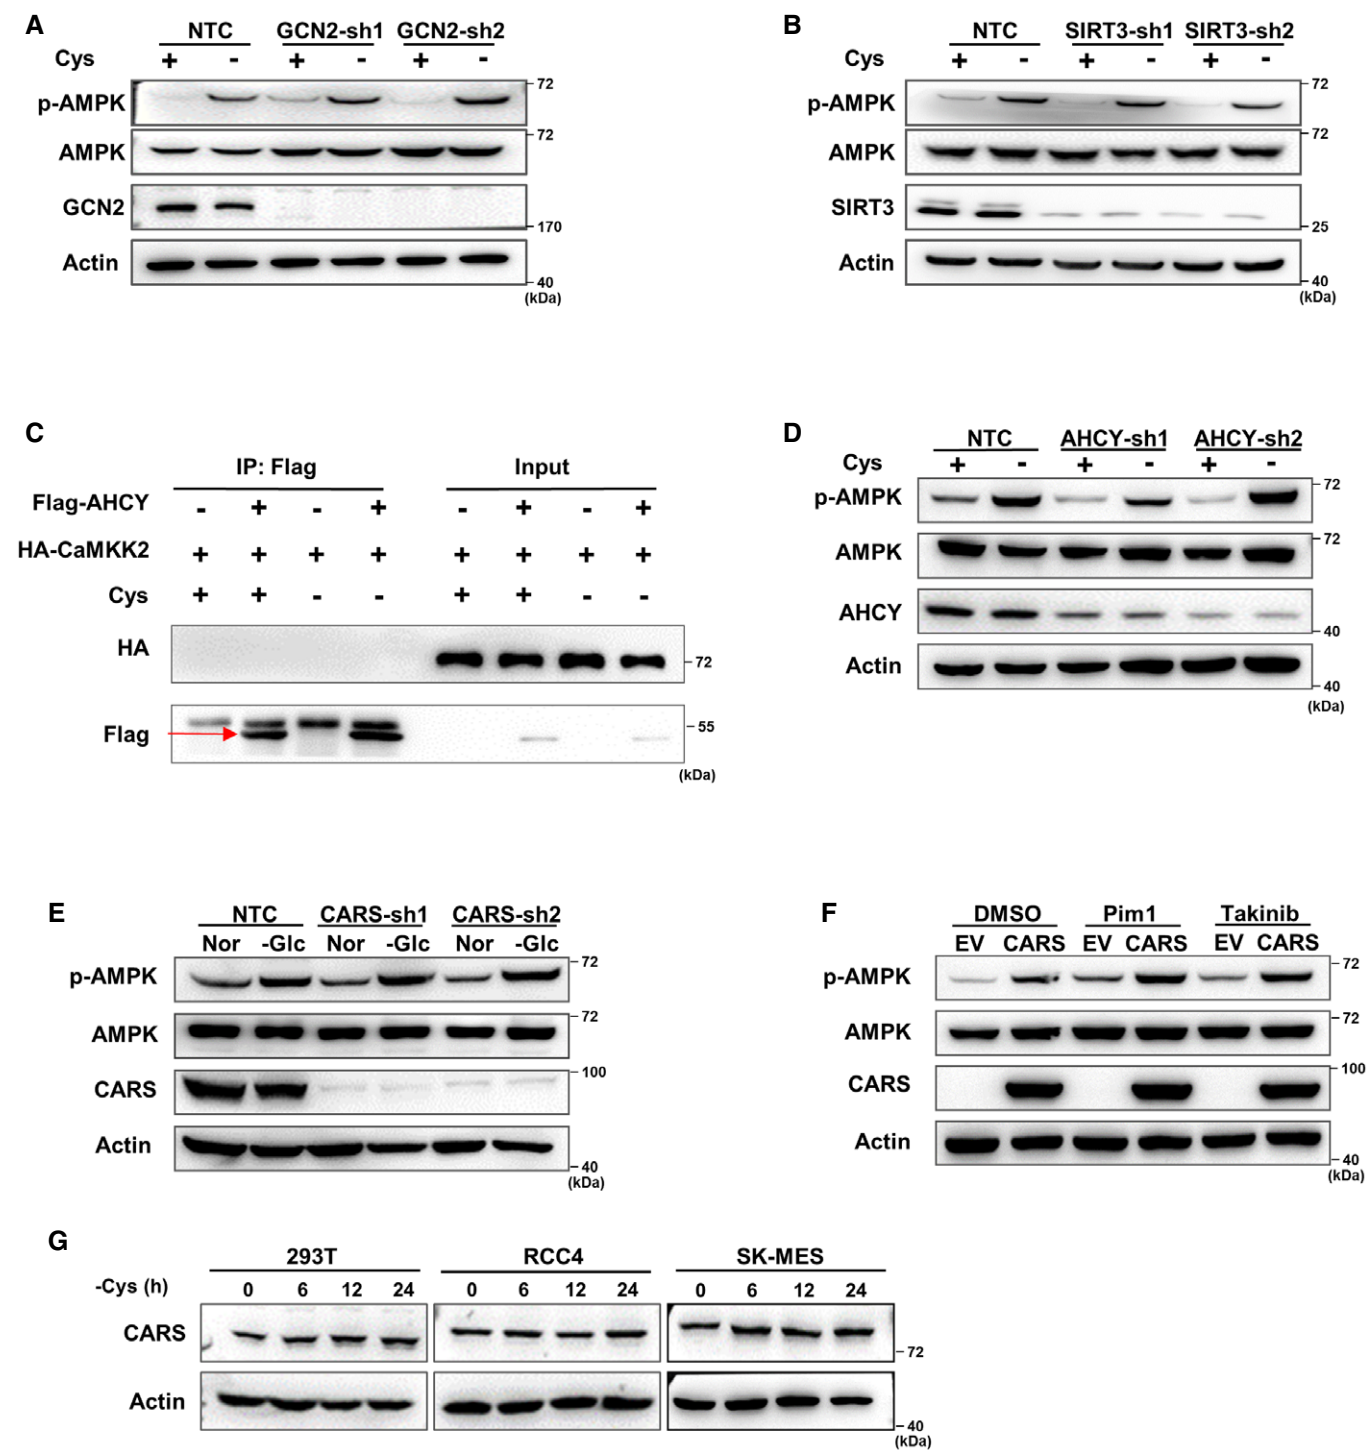

Figure EV2.

**Figure EV2. CARS is critical for AMPK activation under cystine starvation condition.**

- A, B WB analysis of p-AMPK and total AMPK protein expression in 293T cells transfected with shRNAs targeting GCN2 (A) or Sirt3 (B) and further treated with cystine-deficient medium for 8 h. Actin served as the loading control.
- C 293T cells were transfected with HA-CaMKK2 alone or with Flag-AHCY for 48 h and then cultured with cystine-deficient medium or complete medium for 8 h. Cell lysates were immunoprecipitated with anti-Flag, and a WB analysis was performed. The red arrow indicates the target band.
- D WB analysis of p-AMPK and total AMPK protein expression in 293T cells transfected with shRNAs targeting AHCY and further treated with cystine-deficient medium for 8 h. Actin served as the loading control.
- E WB analysis of p-AMPK and total AMPK protein expression in 293T cells transfected with shRNAs targeting CARS and further treated with glucose-deficient medium for 2 h. Actin served as the loading control.
- F WB analysis of p-AMPK and total AMPK protein expression in CARS-overexpressing 293T cells treated with DMSO, pim1, or Takinib for 8 h. Actin served as the loading control.
- G WB analysis of CARS protein expression in 293T, RCC4 and SK-MES cells treated with cystine-deficient medium for 0, 6, 12 or 24 h. Actin served as the loading control.

Source data are available online for this figure.

**Figure EV3. CARS senses cystine starvation to activate AMPK through direct combination with AMPK $\gamma$ 2.**

- A Coomassie Blue staining of His-CARS protein purified from *E. coli*. "M" = marker. The red arrow indicates the target band.
- B Protein sequences of AMPK $\gamma$ 1 and AMPK $\gamma$ 2 were compared using Jellyfish software. The model below shows the segments of AMPK $\gamma$ 1 and AMPK $\gamma$ 2.
- C 293T cells were transfected with HA-AMPK $\gamma$ 2 alone or with Flag-CARS, Flag-CARS-N-terminus, Flag-CARS-M domain or Flag-CARS-C-terminus for 48 h. Cell lysates were immunoprecipitated with anti-Flag, and WB analysis was performed. The model above shows the segments of CARS.
- D In 293T cells transfected with endogenous knocked down AMPK $\gamma$ 2, wild-type AMPK $\gamma$ 2 or AMPK $\gamma$ 2<sup>R531G</sup> was treated with cystine-deficient medium for 8 h, and WB was performed to detect of p-AMPK, total AMPK and AMPK $\gamma$ 2 protein expression. Actin served as the loading control.

Source data are available online for this figure.

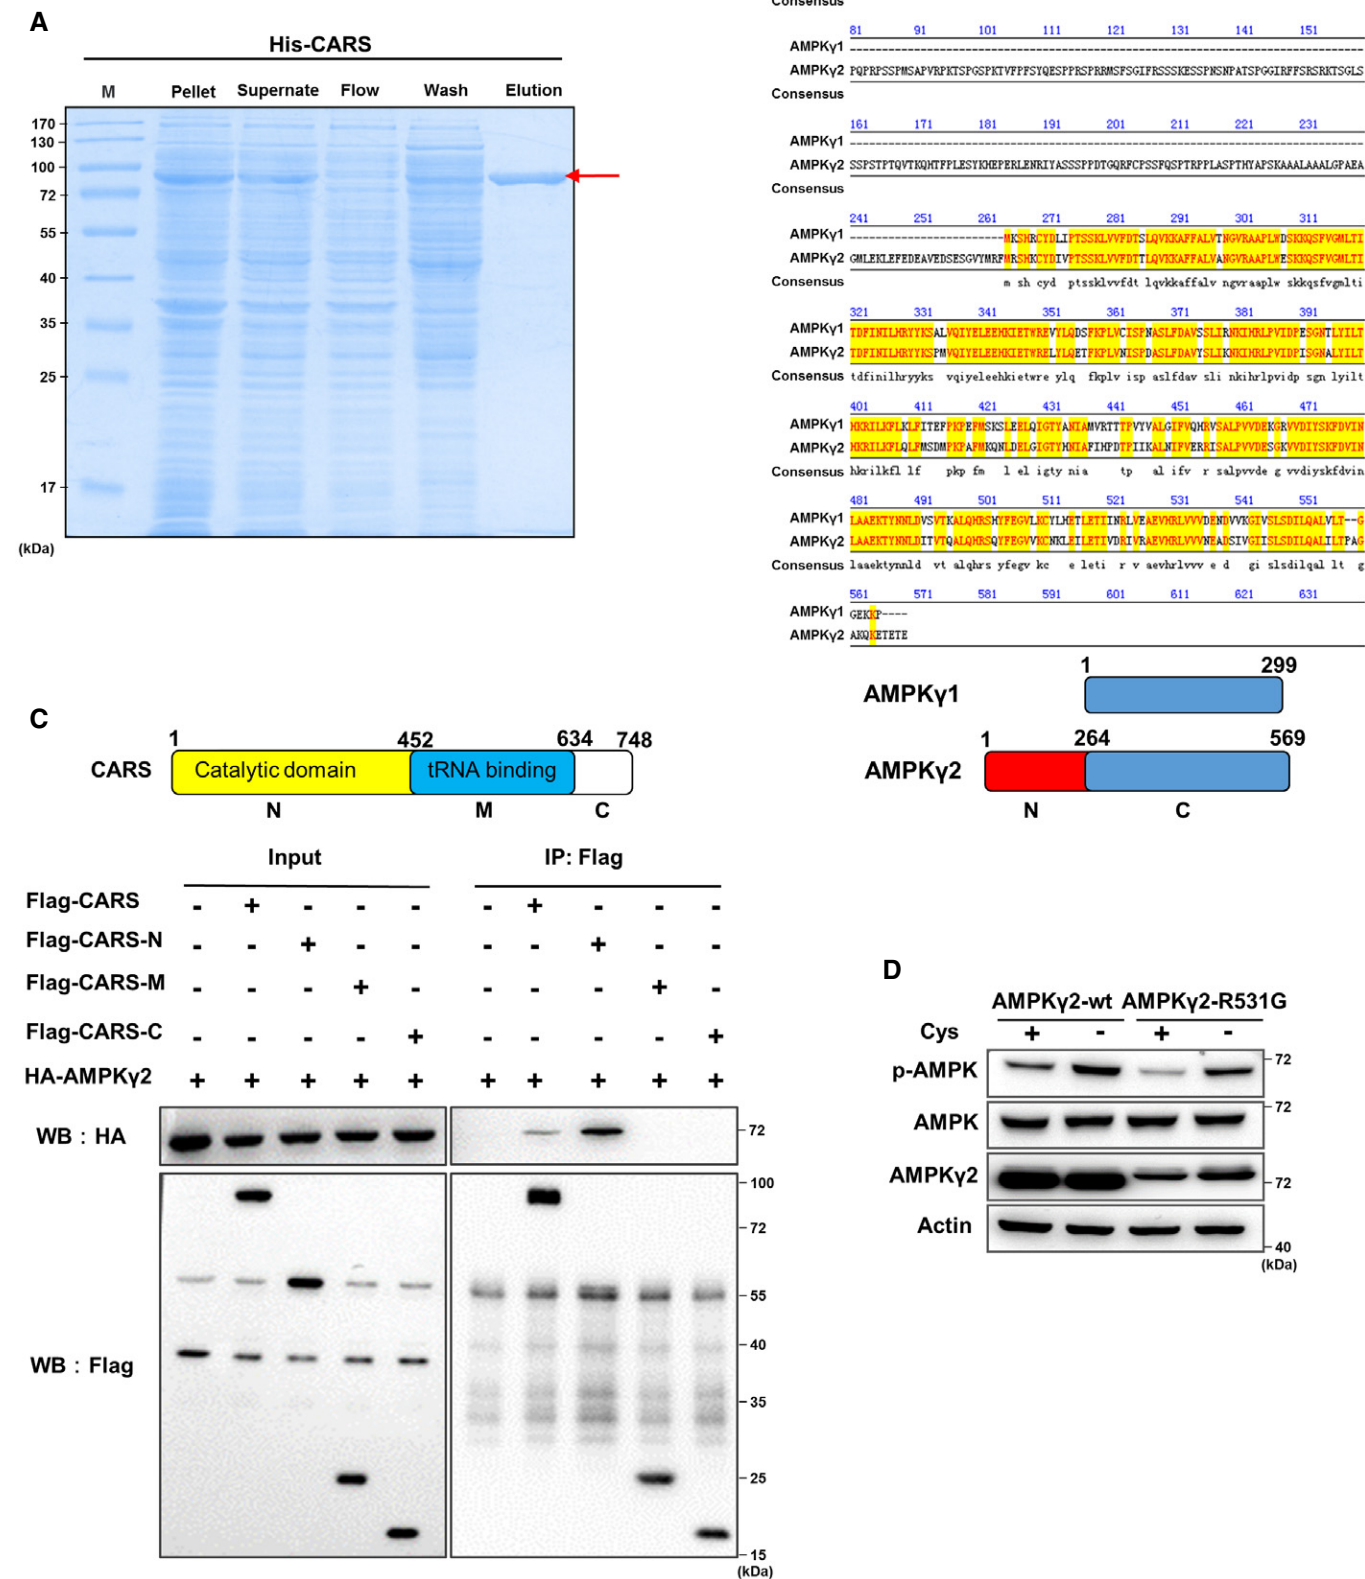

**Figure EV4. The cysteine–CARS–AMPK pathway promotes cell survival.**

- A, B Cell death levels were determined in cystine-deficient medium-cultured RCC4 or SK-MES cells with or without 1  $\mu$ g/ml STO-609 for 24 h. Data are presented as the mean ( $\pm$  SD) of three independent experiments. "Nor" = normal medium; "-Cys" = cystine-deficient medium. \* $P$  < 0.05 [two-tailed Student's  $t$ -test], compared with the indicated groups.
- C, D The crystal violet assay (C) and apoptosis rate assay (D) were performed in 293T cells transfected with shRNAs targeting NTC, CARS, CaMKK2 or AMPK $\gamma$ 2 and further treated with cystine-deficient medium for 24 h with or without 100  $\mu$ M PT1 or 30  $\mu$ M GSK621. Data are presented as the mean ( $\pm$  SD) of three independent experiments. NS, not significant; \* $P$  < 0.05 [two-tailed Student's  $t$ -test], compared with the indicated groups.
- E 786-O, NCI-1650 and HT1080 cells were treated with cystine-deficient medium for 0, 6, 12 and 24 h, respectively. The protein levels of p-AMPK and total AMPK were measured by WB, and actin served as the loading control.
- F The crystal violet assay was performed in cystine-deficient medium-cultured 786-O, NCI-1650 and HT1080 cells with or without 1 mM AICAR.

Source data are available online for this figure.

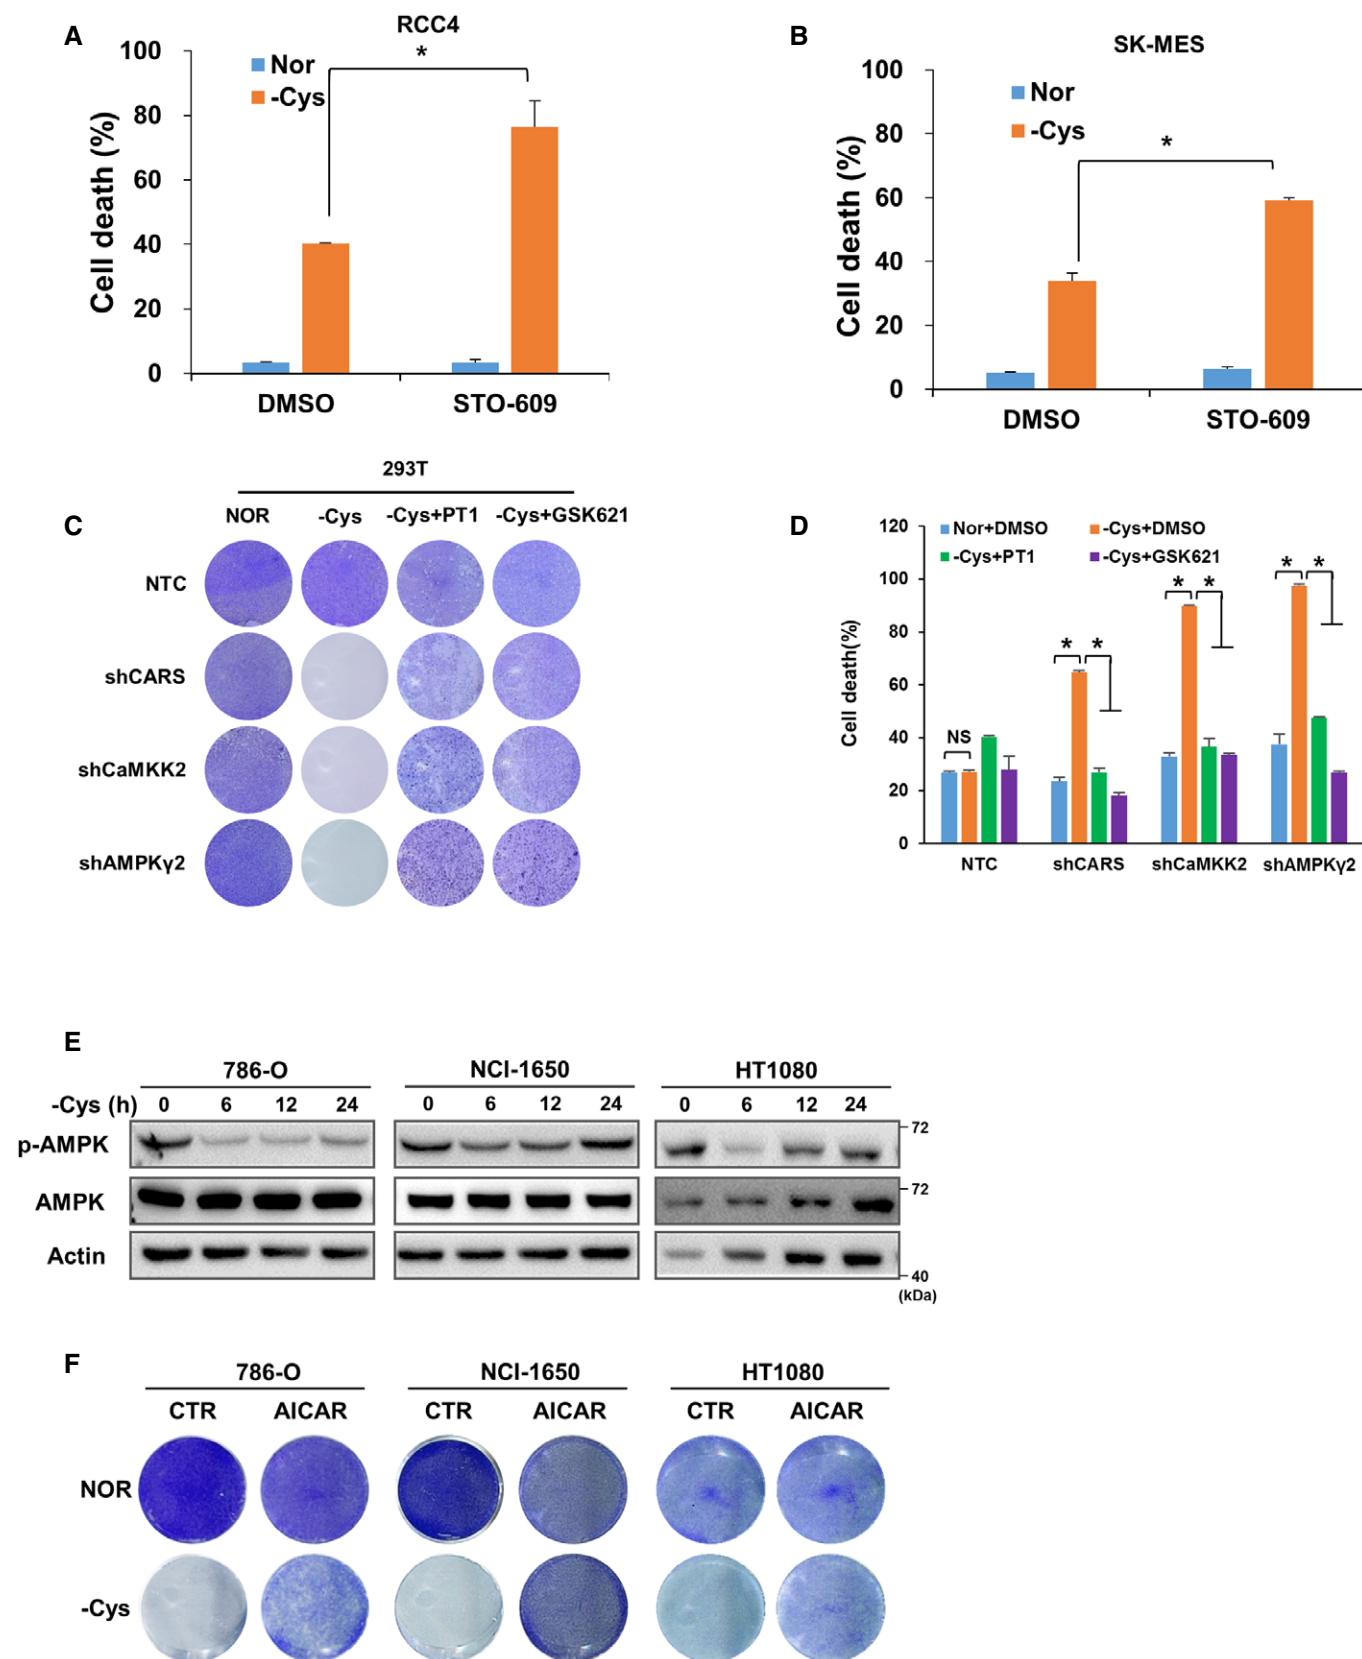

Figure EV4.
