# Supplementary material
Source: PubMed Central journal article supplement (PMC8561634)

**Fig 2B**

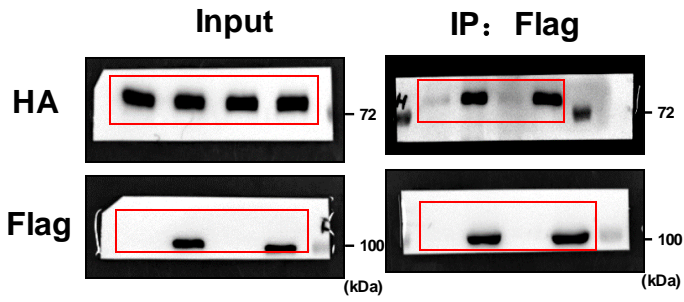

**Fig 2C**

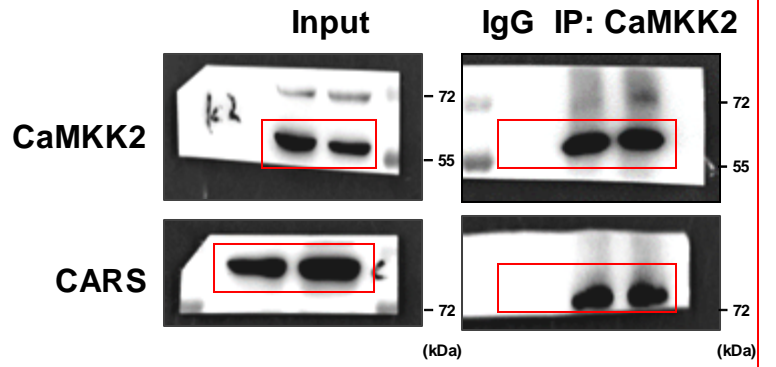

**Fig 2D**

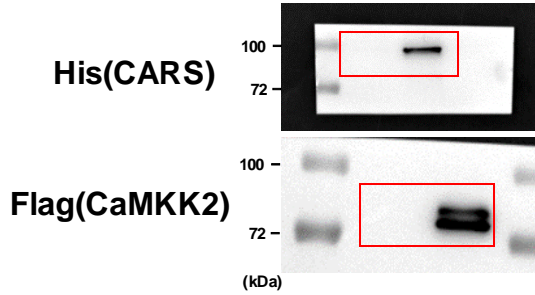

**Fig 2E**

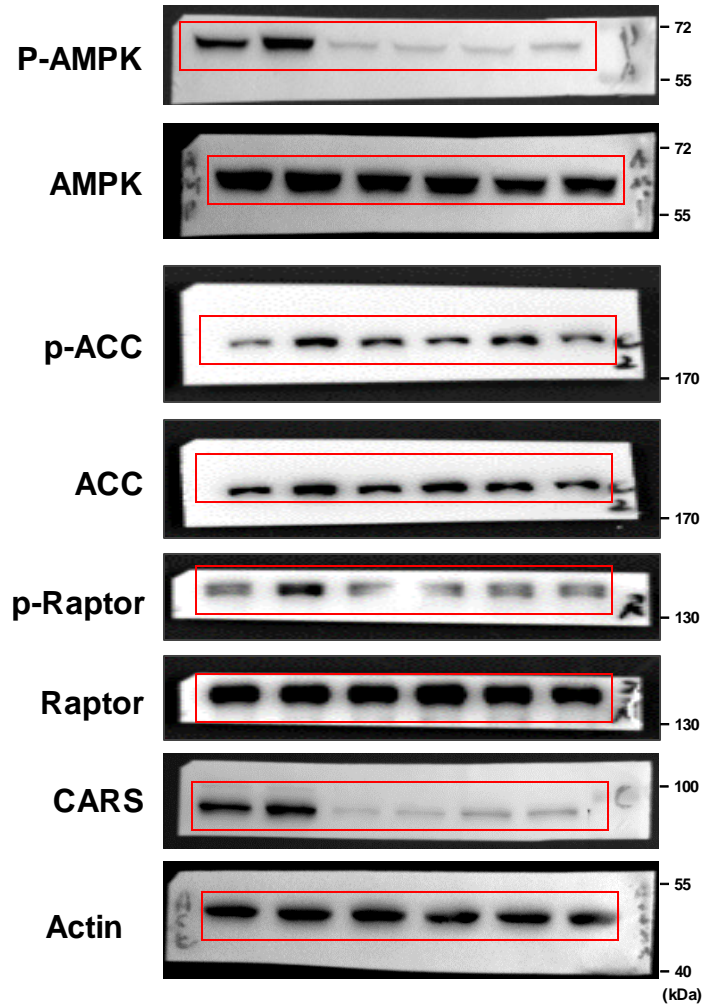

**Fig 2F**

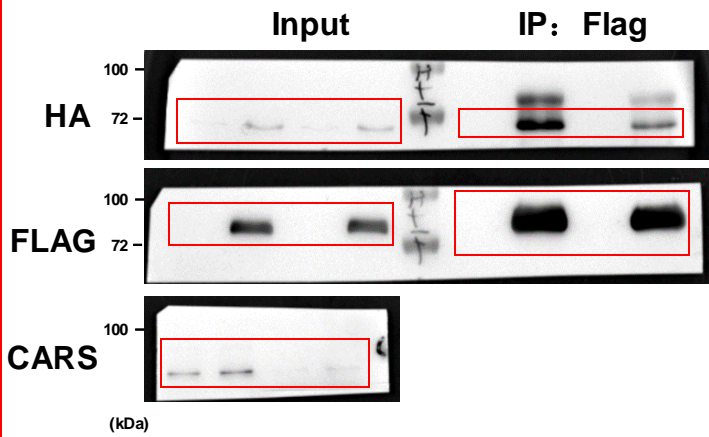

**Fig 2G**

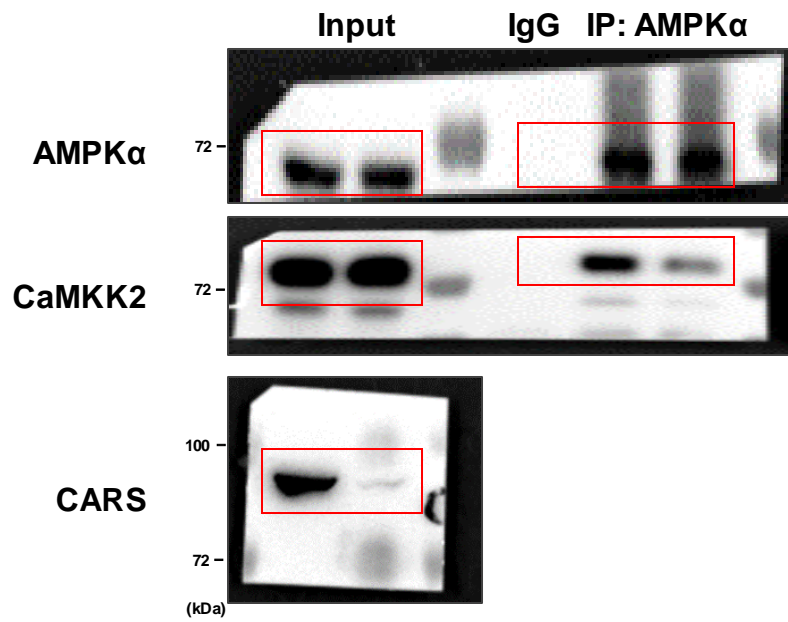

**Fig 2H**

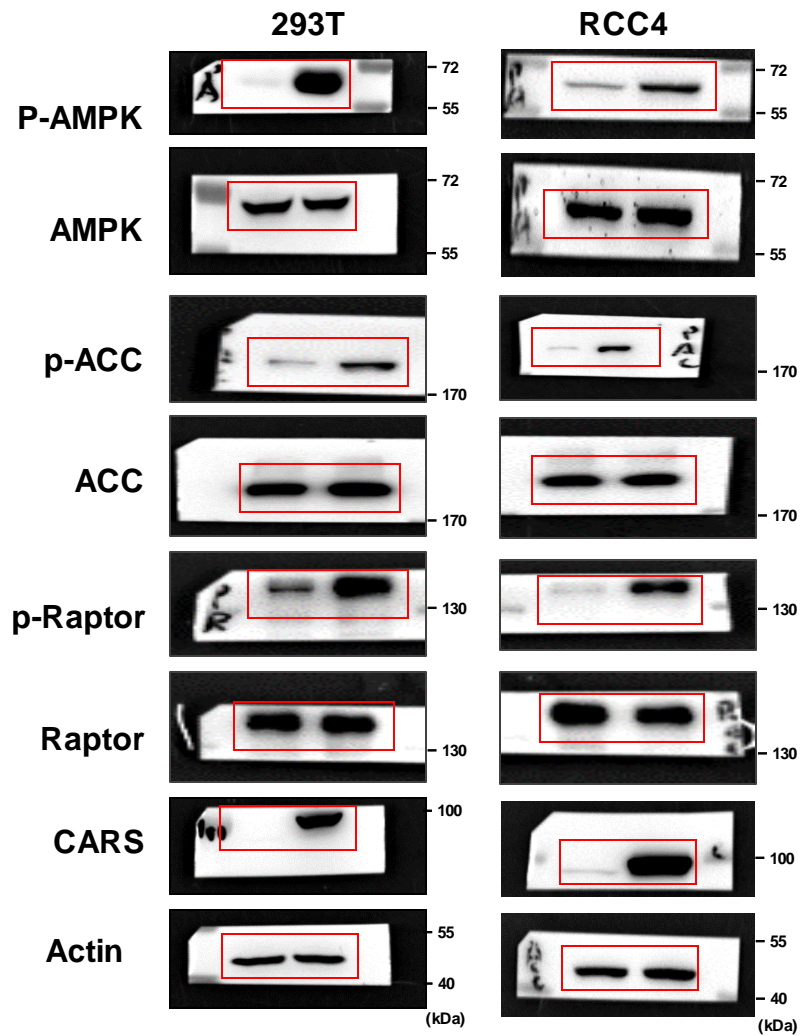

**Fig 2I**

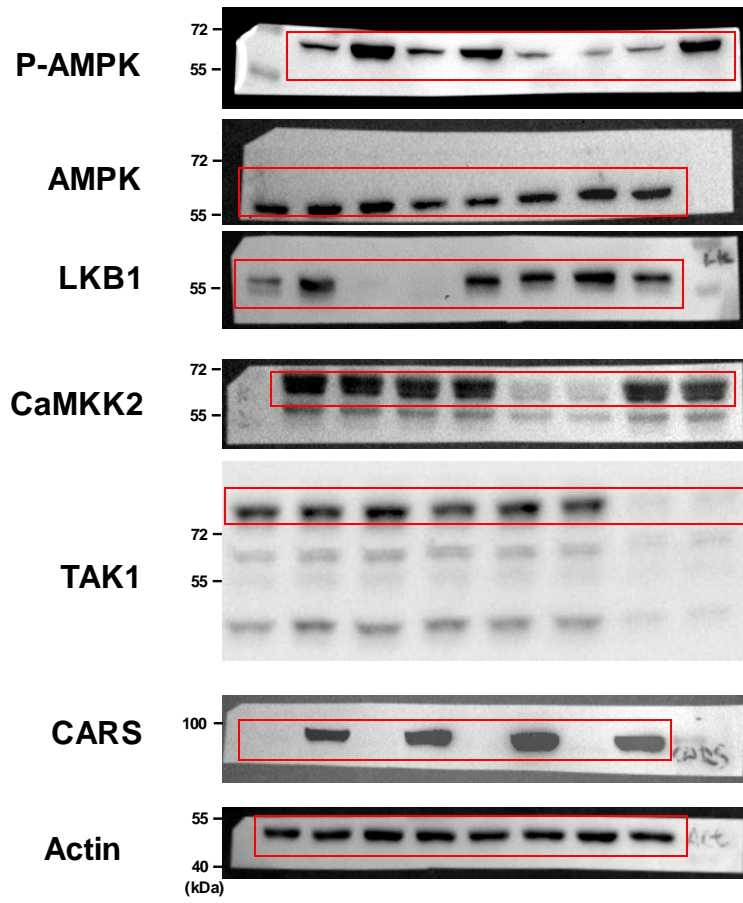

**Fig 2J**

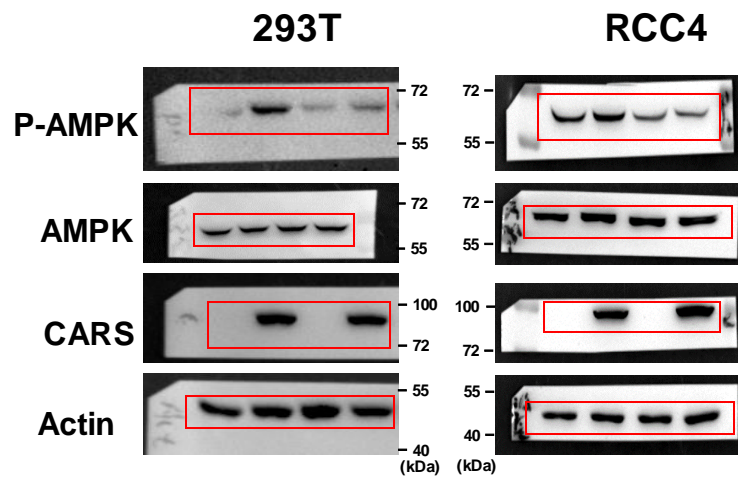

Supplement: EMBJ-40-e108028-s002.pdf [file EMBJ-40-e108028-s002.pdf]

**Fig 3A**

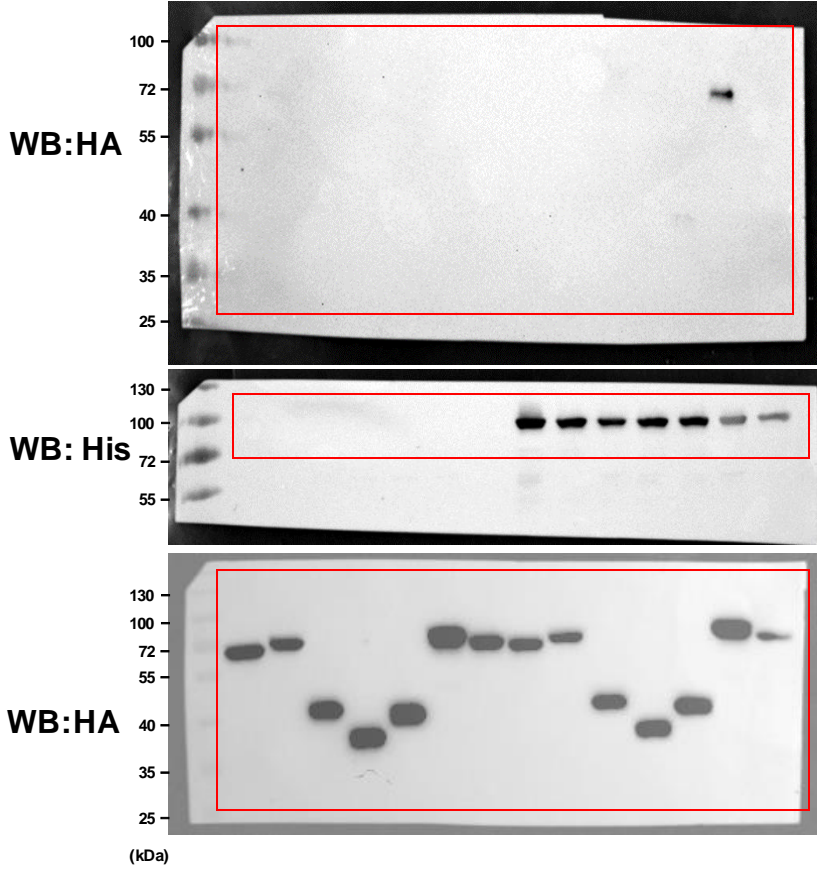

**Fig 3B**

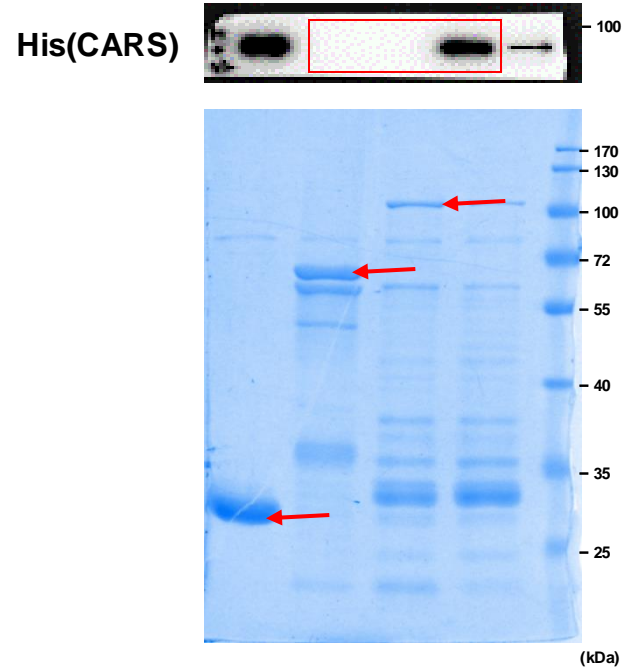

**Fig 3C**

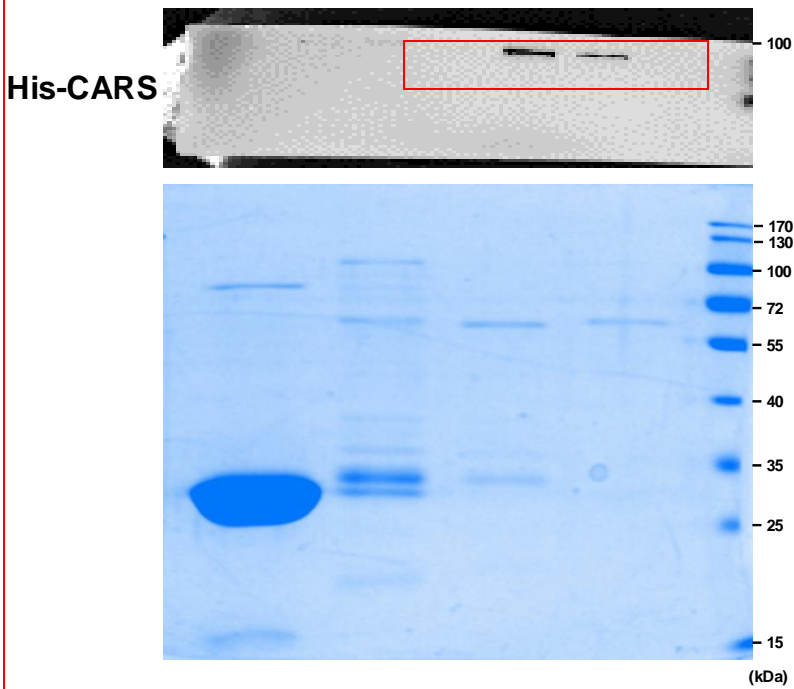

**Fig 3D**

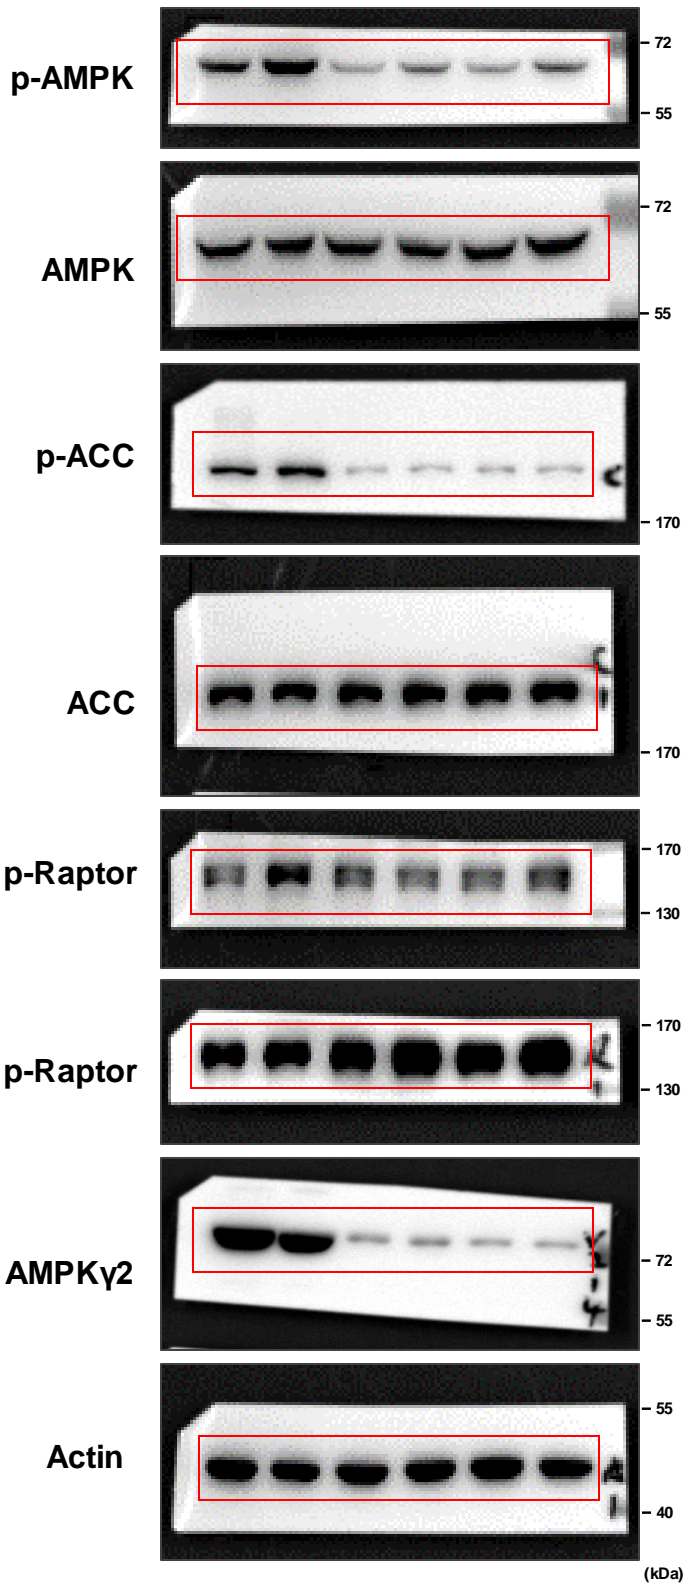

**Fig 3E**

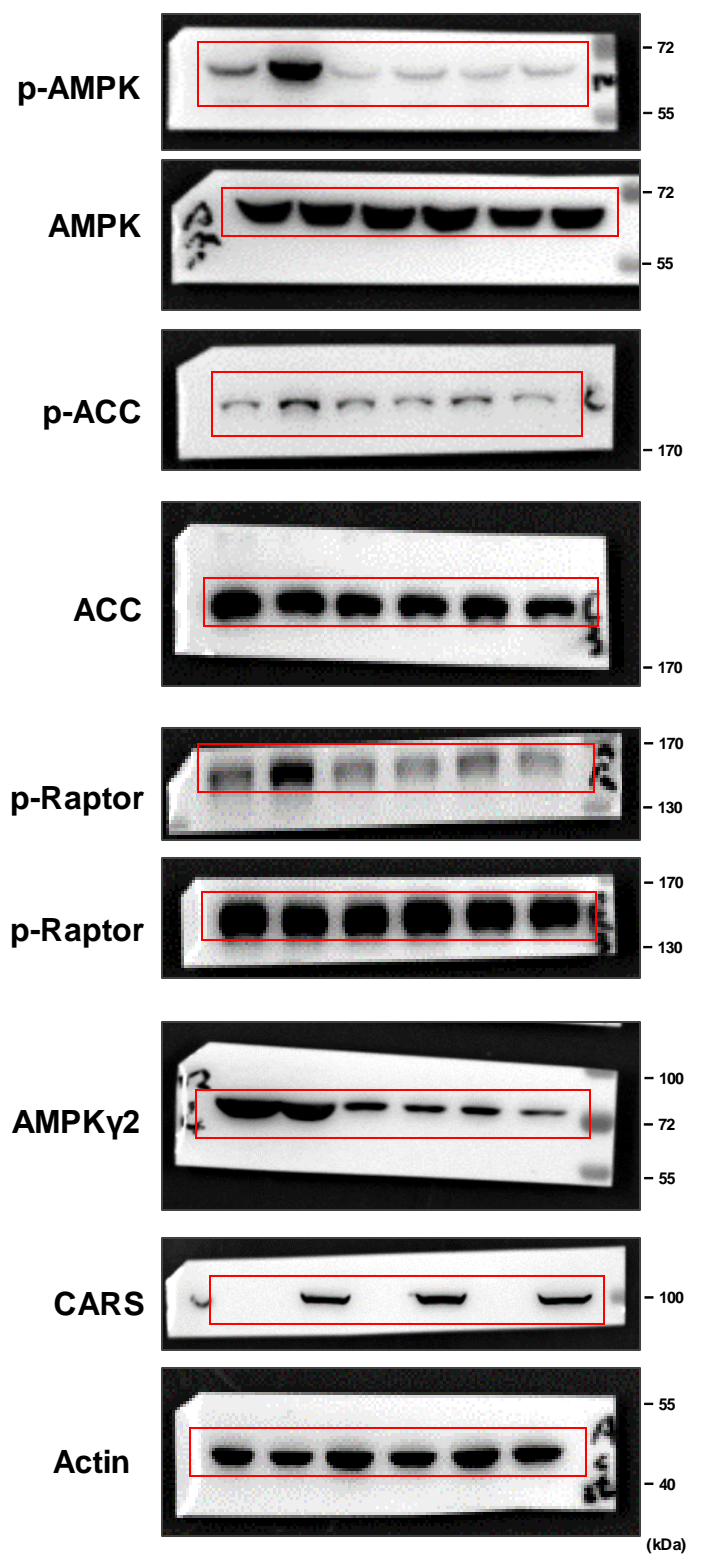

**Fig 3F**

Input

IP: Flag

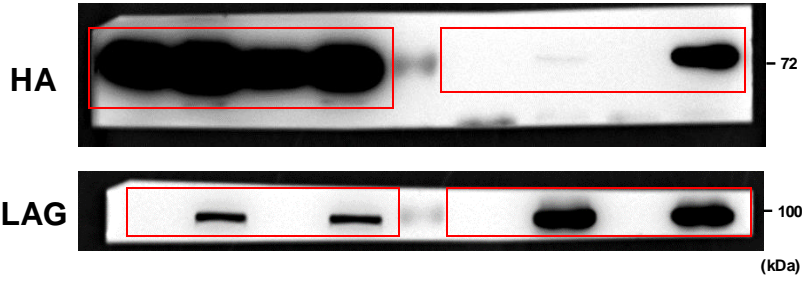

**Fig 3G**

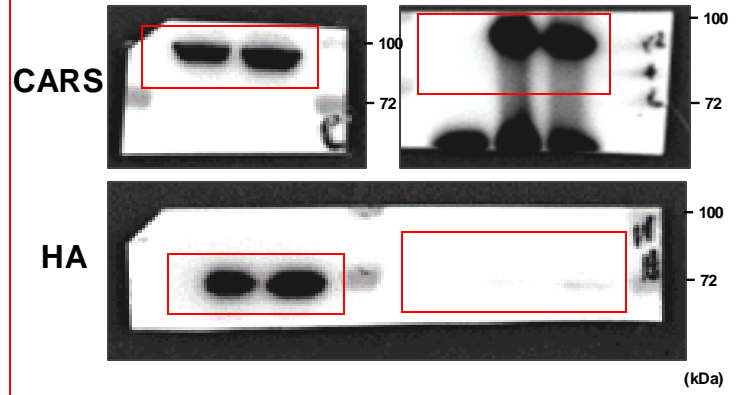

**Fig 3H**

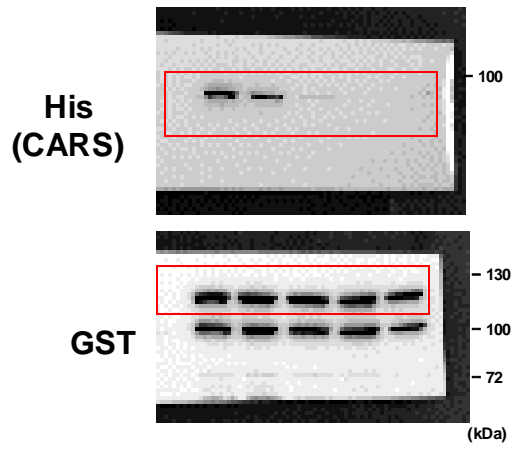

Supplement: EMBJ-40-e108028-s004.pdf [file EMBJ-40-e108028-s004.pdf]

**Fig 4E**

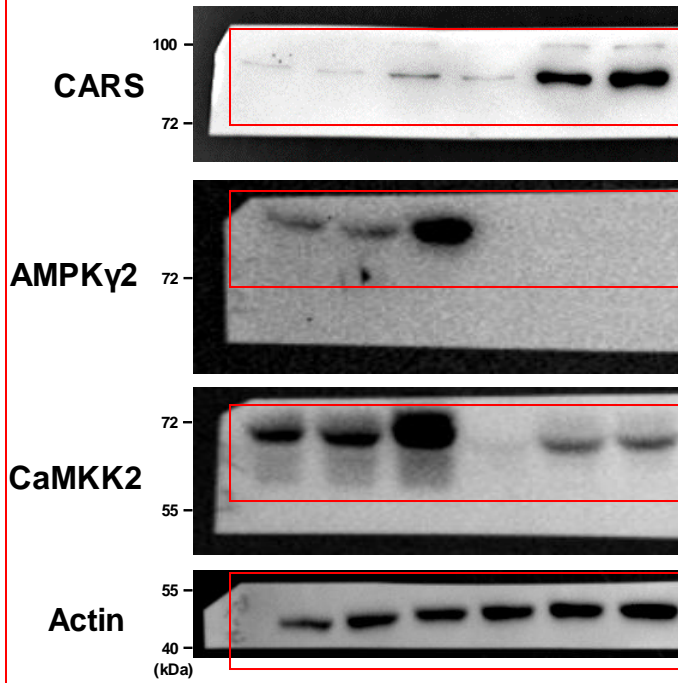

**Fig 4F**

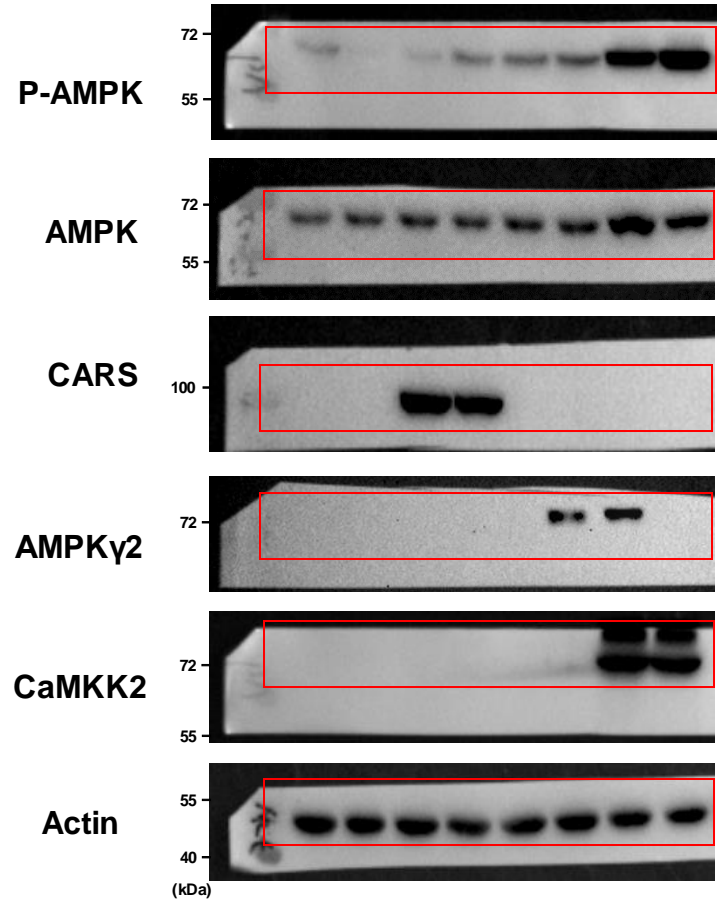

Supplement: EMBJ-40-e108028-s005.pdf [file EMBJ-40-e108028-s005.pdf]

Fig 1A

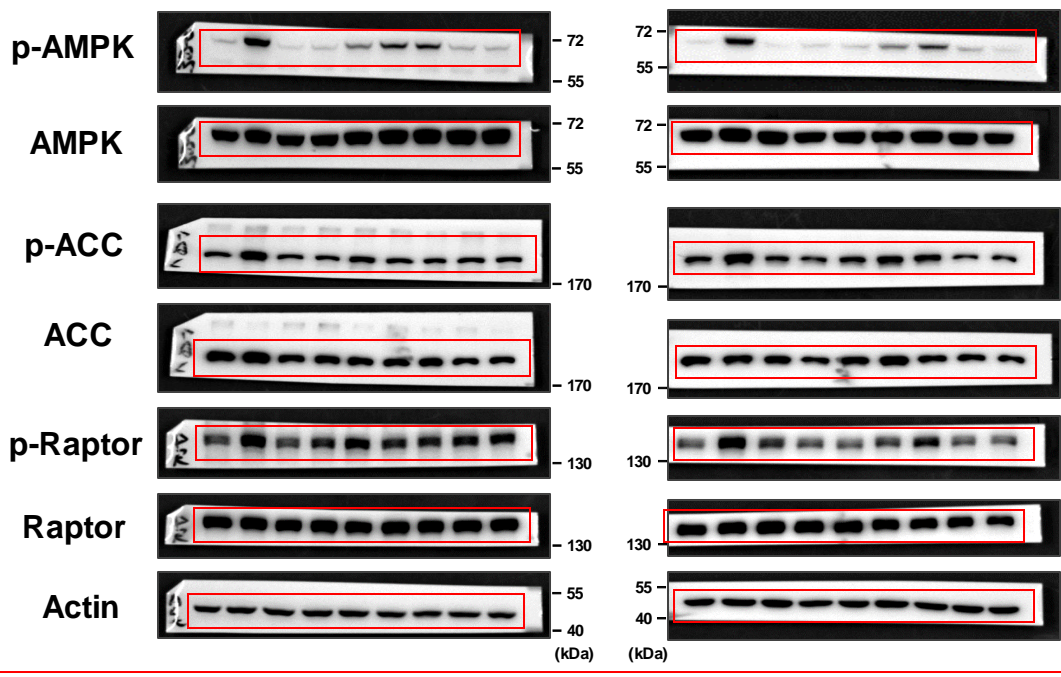

Fig 1B

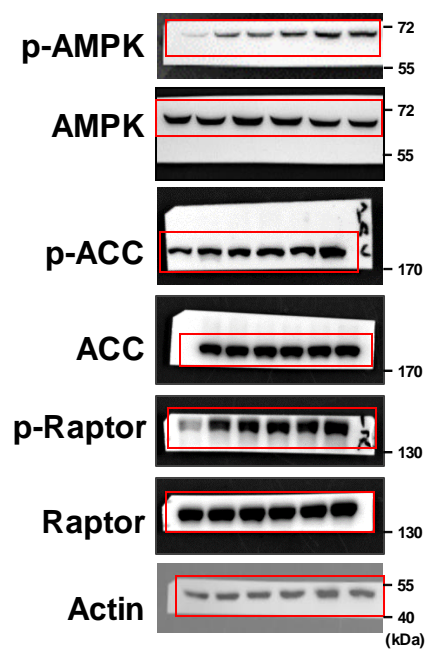

Fig 1C

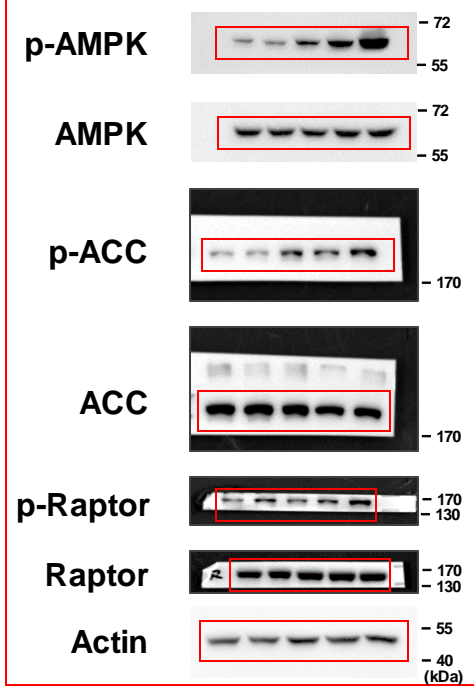

Fig 1D

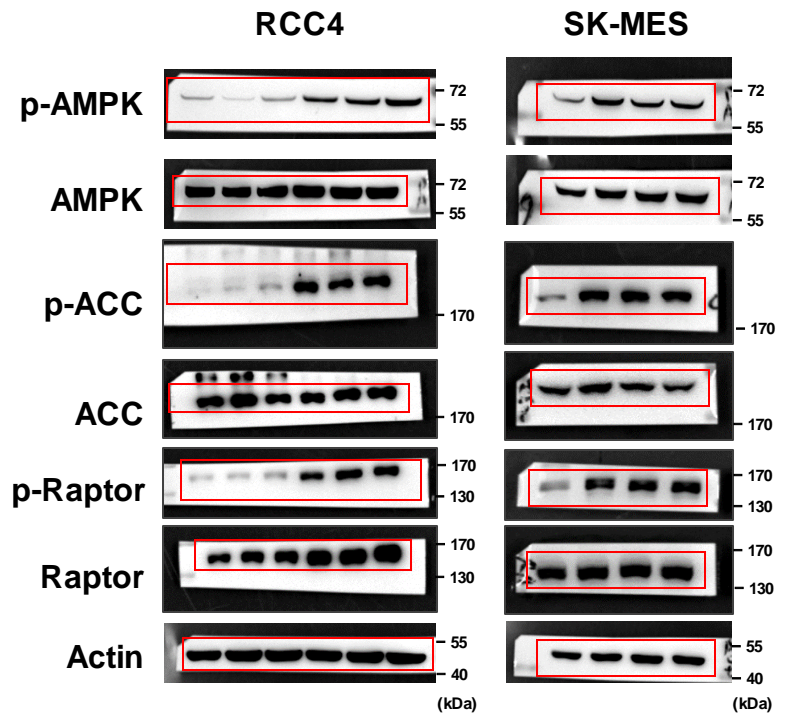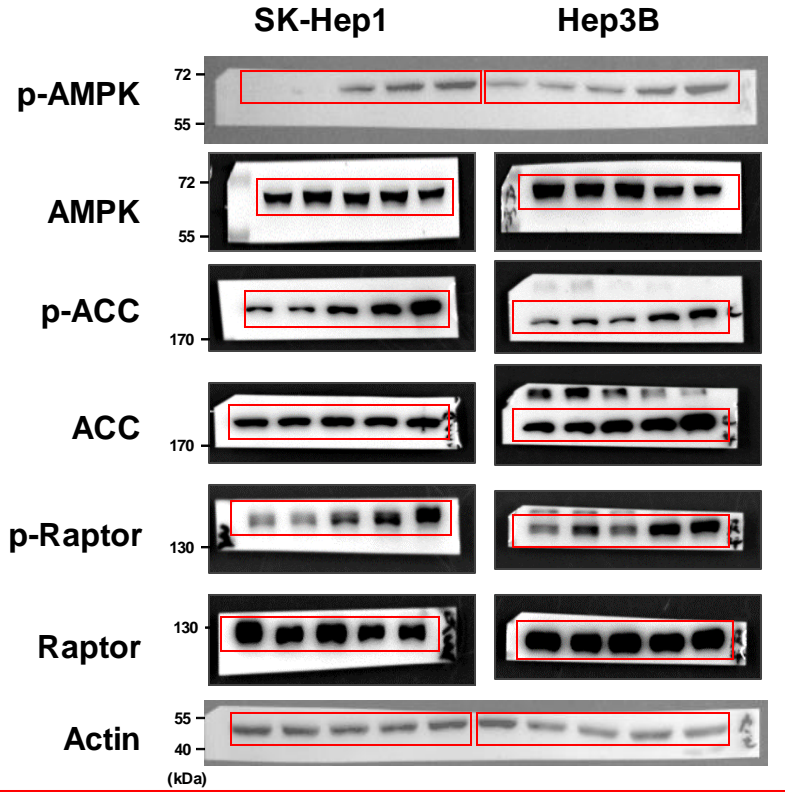

**Fig 1F**

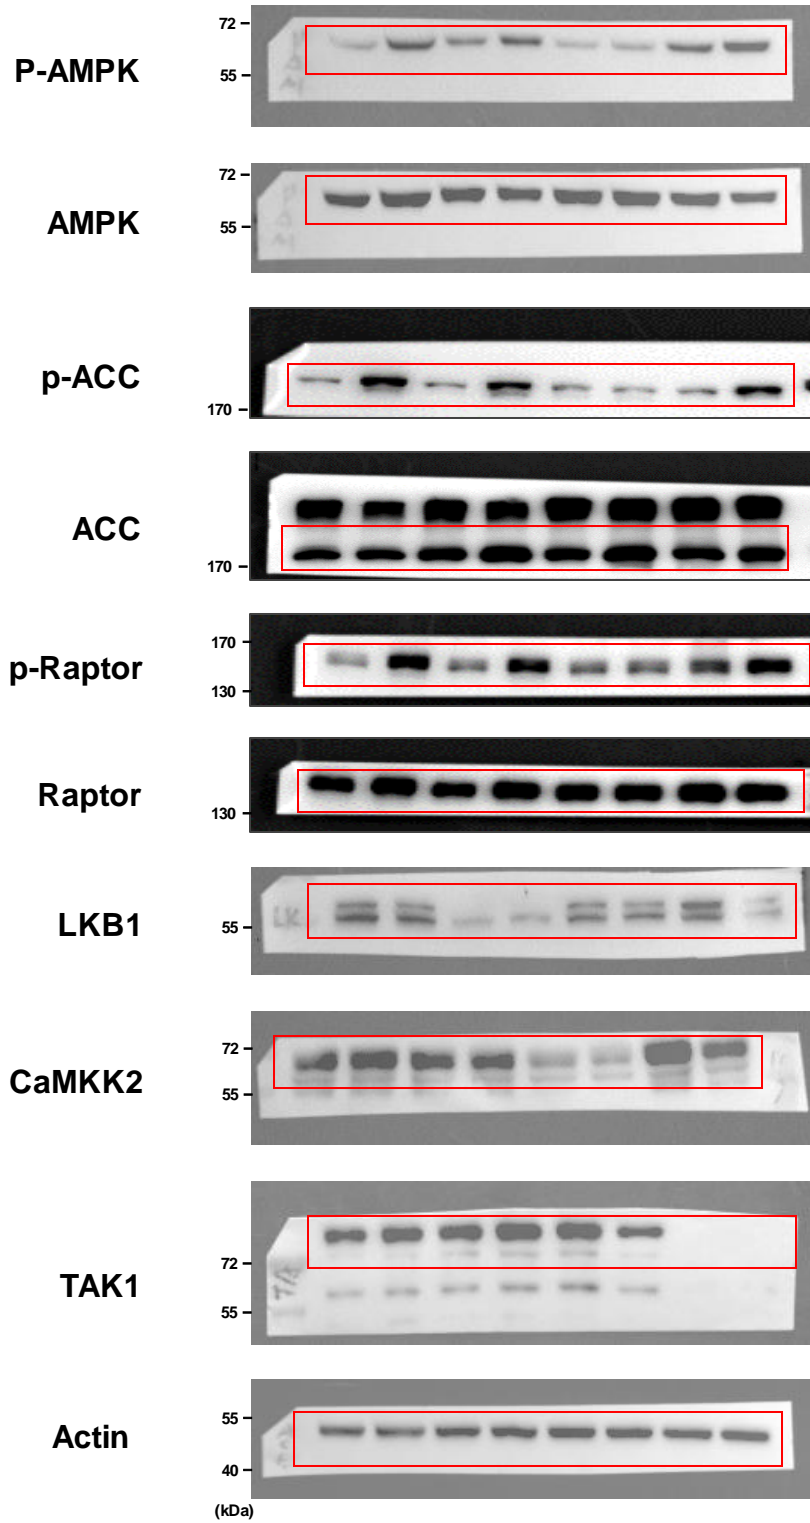

**Fig 1G**

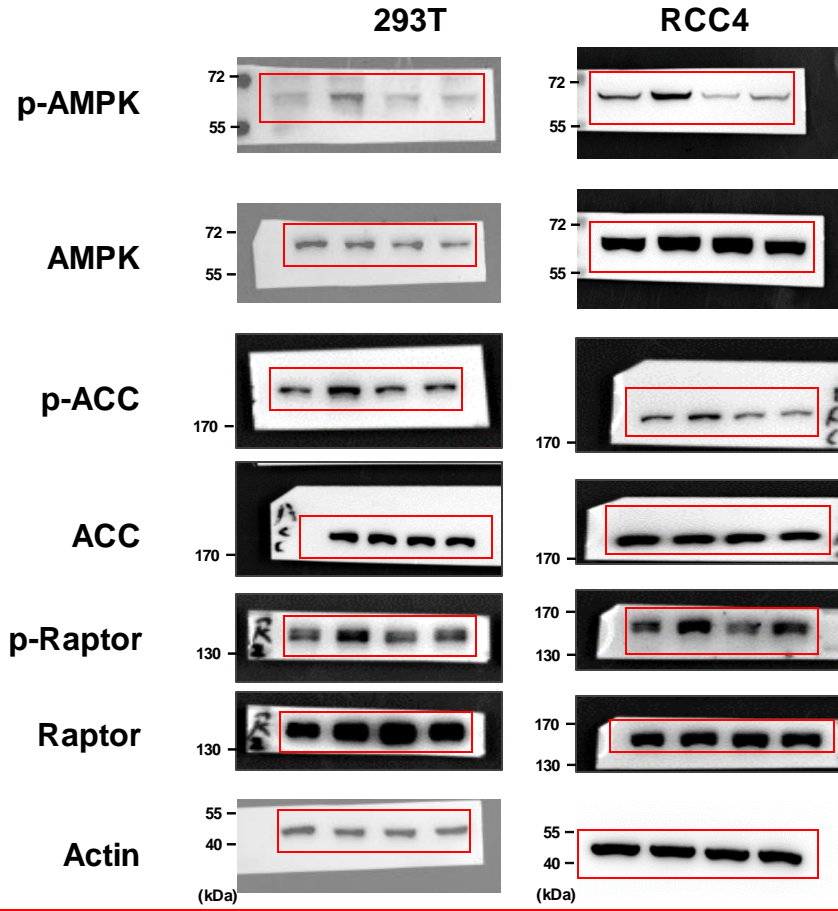

**Fig 1H**

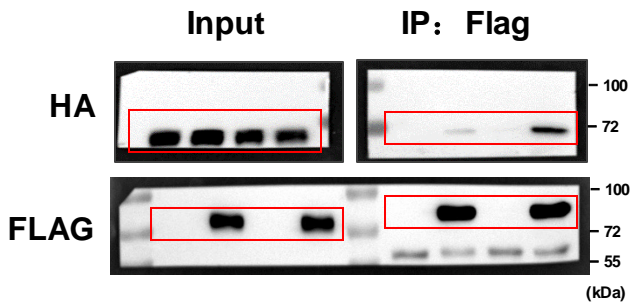

**Fig 1I**

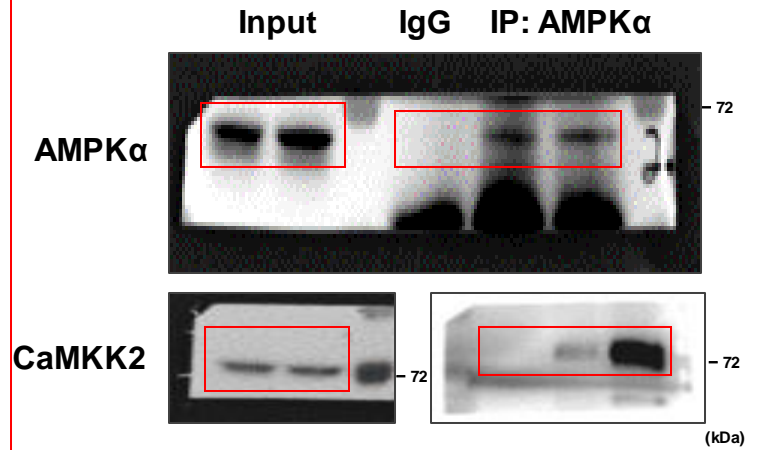

Supplement: EMBJ-40-e108028-s010.pdf [file EMBJ-40-e108028-s010.pdf]
